# Supplementary material for: The 1-minute sit-to-stand test to detect desaturation during 6-minute walk test in interstitial lung disease
Source: PubMed Central journal article supplement (PMC8795411; doi:10.1038/s41533-022-00268-w), 2022-01-27
Supplement: 41533_2022_268_MOESM1_ESM.pdf [file 41533_2022_268_MOESM1_ESM.pdf]

1 **Supplementary Table 1 Diagnostic ability to identify desaturation during the**  
 2 **6MWT in IPF patients**

|                  | <b>AUC</b>       | <b>Sensitivity</b> | <b>Specificity</b> | <b>Cut-off value</b> |
|------------------|------------------|--------------------|--------------------|----------------------|
| 1STST nadir SpO2 | 0.92 (0.78–0.97) | 83%                | 100%               | 89%                  |
| FVC % predicted  | 0.76 (0.61–0.87) | 63%                | 88%                | 82.7                 |
| DLCO % predicted | 0.91 (0.80–0.96) | 83%                | 92%                | 65.6                 |
| PaO2 at rest     | 0.64 (0.46–0.78) | 56%                | 82%                | 86.5 Torr            |

3 PaO2, arterial partial pressure of oxygen; 1STST, 1-min sit-to-stand test; 6MWT, 6-min walk test;  
 4 FVC, forced vital capacity; DLCO, diffusion lung capacity for carbon monoxide; AUC, area under  
 5 the curve; CI, confidence interval.

6  
 7

8 **Supplementary Table 2 Diagnostic ability to identify desaturation during the**  
 9 **6MWT in good PS**

|                  | <b>AUC (95% CI)</b> | <b>Sensitivity</b> | <b>Specificity</b> | <b>Cut-off value</b> |
|------------------|---------------------|--------------------|--------------------|----------------------|
| 1STST nadir SpO2 | 0.93 (0.83–0.97)    | 90%                | 90%                | 92%                  |
| FVC % predicted  | 0.70 (0.58–0.79)    | 62%                | 79%                | 80.1                 |
| DLCO % predicted | 0.84 (0.74–0.90)    | 76%                | 82%                | 66.0                 |
| PaO2 at rest     | 0.57 (0.43–0.70)    | 64%                | 66%                | 89.0 Torr            |

10 PaO2, arterial partial pressure of oxygen; 1STST, 1-min sit-to-stand test; 6MWT, 6-min walk test;  
 11 FVC, forced vital capacity; DLCO, diffusion lung capacity for carbon monoxide; AUC, area under  
 12 the curve; CI, confidence interval.

13  
 14  
 15  
 16  
 17  
 18

19 **Supplementary Table 3 Diagnostic ability to identify desaturation during the**  
 20 **6MWT in good mMRC**

|                  | <b>AUC (95% CI)</b> | <b>Sensitivity</b> | <b>Specificity</b> | <b>Cut-off value</b> |
|------------------|---------------------|--------------------|--------------------|----------------------|
| 1STST nadir SpO2 | 0.90 (0.75–0.97)    | 85%                | 91%                | 92%                  |
| FVC % predicted  | 0.68 (0.54–0.80)    | 58%                | 82%                | 80.1                 |
| DLCO % predicted | 0.86 (0.74–0.92)    | 69%                | 89%                | 61.3                 |
| PaO2 at rest     | 0.62 (0.44–0.78)    | 60%                | 83%                | 86.5 Torr            |

21 PaO2, arterial partial pressure of oxygen; 1STST, 1-min sit-to-stand test; 6MWT, 6-min walk test;  
 22 FVC, forced vital capacity; DLCO, diffusion lung capacity for carbon monoxide; AUC, area under  
 23 the curve; CI, confidence interval.

24  
 25

26 **Supplementary Table 4 Definition of the Japanese severity staging systems for**  
 27 **Idiopathic interstitial pneumonias**

| <b>PaO2</b> | <b>SpO2 &lt; 90% at the end of 6MWT</b> | <b>Stage</b> |
|-------------|-----------------------------------------|--------------|
| ≥80 Torr    | No                                      | I            |
|             | Yes                                     | I            |
| 70-79 Torr  | No                                      | II           |
|             | Yes                                     | III          |
| 60-69 Torr  | No                                      | III          |
|             | Yes                                     | IV           |
| <60 Torr    | No                                      | IV           |
|             | Yes                                     | IV           |

28 PaO2, arterial partial pressure of oxygen; SpO2, pulse oxygen saturation; 6MWT, 6-min walk test.  
 29
